# Supplementary material for: Sleep oscillation-specific associations with Alzheimer’s disease CSF biomarkers: novel roles for sleep spindles and tau
Source: PubMed Central journal article supplement (PMC6385427; doi:10.1186/s13024-019-0309-5), 2019-02-21

Figure S1

A.

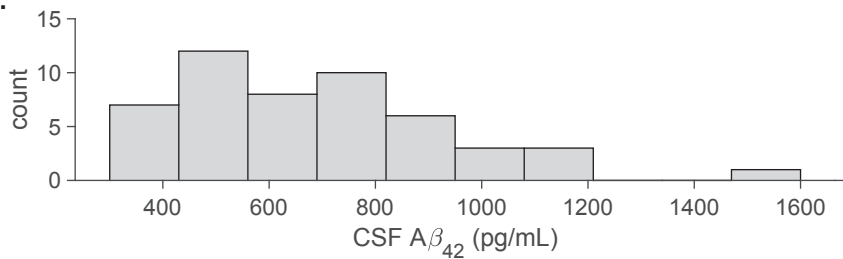

B.

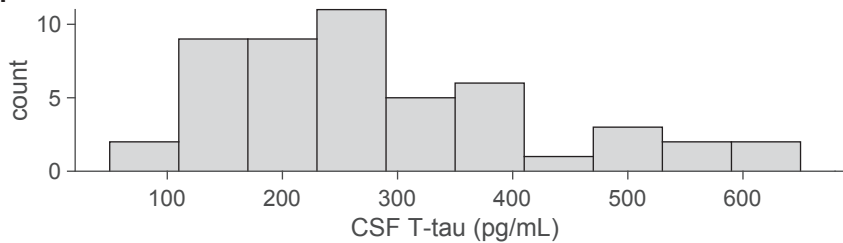

C.

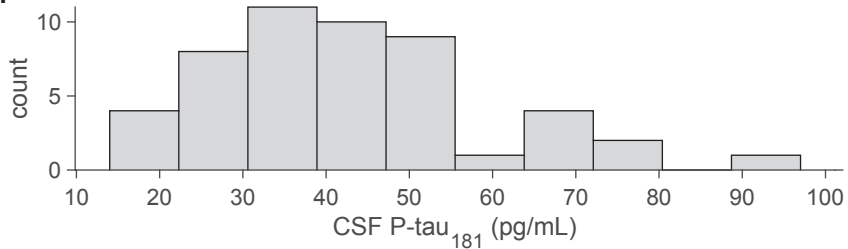

Figure S2

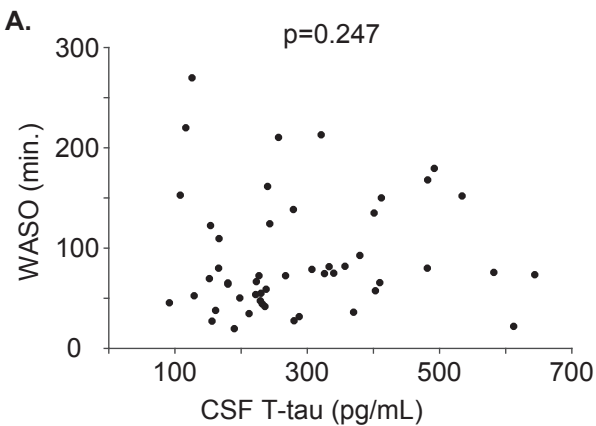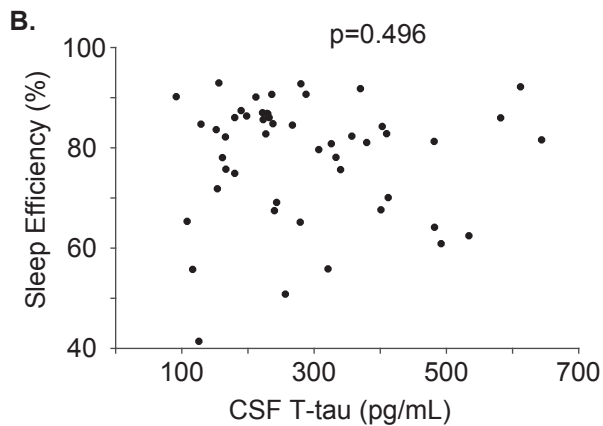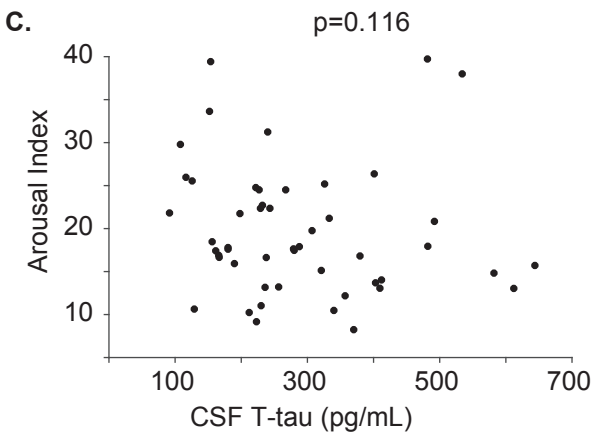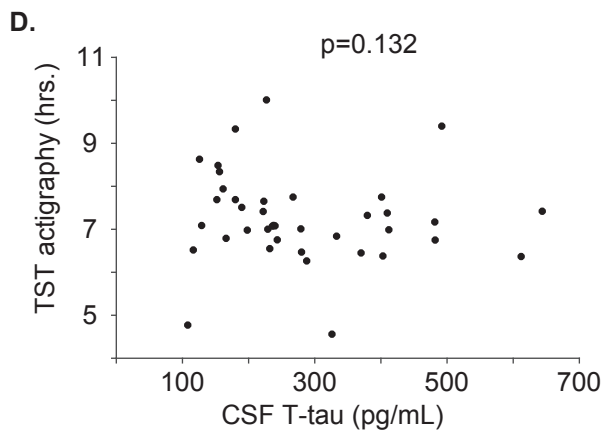

Supplement: 13024_2019_309_MOESM1_ESM.pdf [file 13024_2019_309_MOESM1_ESM.pdf]
